# Supplementary material for: Metabolomic Profile and Functional State of Oat Plants (Avena sativa L.) Sown under Low-Temperature Conditions in the Cryolithozone
Source: MDPI journal article supplement (doi:10.3390/plants13081076), 2024-04-11
Supplement: s1 [file s1]

**Table S1.** Metabolites and their chemical formulas from *A. sativa* leaves

| <b>№</b> | <b>tr, min</b> | <b>Compound</b>             | <b>Chemical formula</b>                         |
|----------|----------------|-----------------------------|-------------------------------------------------|
| 1        | 7.01           | Alanine                     | C <sub>3</sub> H <sub>7</sub> NO <sub>2</sub>   |
| 2        | 9.37           | Valine                      | C <sub>5</sub> H <sub>11</sub> NO <sub>2</sub>  |
| 3        | 10.59          | Leucine                     | C <sub>6</sub> H <sub>13</sub> NO <sub>2</sub>  |
| 4        | 10.69          | Phosphoric acid             | H <sub>3</sub> PO <sub>4</sub>                  |
| 5        | 11.06          | Proline                     | C <sub>5</sub> H <sub>9</sub> NO <sub>2</sub>   |
| 6        | 11.44          | Succinic acid               | C <sub>4</sub> H <sub>6</sub> O <sub>4</sub>    |
| 7        | 11.95          | Glyceric acid               | C <sub>3</sub> H <sub>6</sub> O <sub>4</sub>    |
| 8        | 12.09          | Itaconic acid               | C <sub>5</sub> H <sub>6</sub> O <sub>4</sub>    |
| 9        | 12.57          | Serine                      | C <sub>3</sub> H <sub>7</sub> NO <sub>3</sub>   |
| 10       | 13.15          | Threonine                   | C <sub>4</sub> H <sub>9</sub> NO <sub>3</sub>   |
| 11       | 15.25          | Malic acid                  | C <sub>4</sub> H <sub>6</sub> O <sub>5</sub>    |
| 12       | 15.79          | 5-Oxoproline                | C <sub>5</sub> H <sub>7</sub> NO <sub>3</sub>   |
| 13       | 15.93          | Aminobutyric acid           | C <sub>4</sub> H <sub>9</sub> NO <sub>2</sub>   |
| 14       | 16.45          | Erythronic acid             | C <sub>4</sub> H <sub>8</sub> O <sub>5</sub>    |
| 15       | 17.79          | Glutamic acid               | C <sub>5</sub> H <sub>9</sub> NO <sub>4</sub>   |
| 16       | 19.30          | Xylose                      | C <sub>5</sub> H <sub>10</sub> O <sub>5</sub>   |
| 17       | 19.89          | Ribitol                     | C <sub>5</sub> H <sub>12</sub> O <sub>5</sub>   |
| 18       | 19.99          | Adonitol                    | C <sub>5</sub> H <sub>12</sub> O <sub>5</sub>   |
| 19       | 20.15          | Aconitic acid               | C <sub>6</sub> H <sub>6</sub> O <sub>6</sub>    |
| 20       | 21.55          | Fructose                    | C <sub>6</sub> H <sub>12</sub> O <sub>6</sub>   |
| 21       | 22.11          | Allose                      | C <sub>6</sub> H <sub>12</sub> O <sub>6</sub>   |
| 22       | 22.34          | Quinic acid                 | C <sub>11</sub> H <sub>9</sub> NO <sub>3</sub>  |
| 23       | 22.88          | Mannose                     | C <sub>6</sub> H <sub>12</sub> O <sub>6</sub>   |
| 24       | 23.65          | Ascorbic acid               | C <sub>6</sub> H <sub>8</sub> O <sub>6</sub>    |
| 25       | 24.38          | Glucose                     | C <sub>6</sub> H <sub>12</sub> O <sub>6</sub>   |
| 26       | 24.82          | Palmitic Acid               | C <sub>16</sub> H <sub>32</sub> O <sub>2</sub>  |
| 27       | 25.99          | Myo-Inositol                | C <sub>6</sub> H <sub>12</sub> O <sub>6</sub>   |
| 28       | 27.29          | Linoleic acid               | C <sub>18</sub> H <sub>32</sub> O <sub>2</sub>  |
| 29       | 27.40          | Linolenic acid              | C <sub>18</sub> H <sub>30</sub> O <sub>2</sub>  |
| 30       | 27.75          | Stearic acid                | C <sub>18</sub> H <sub>36</sub> O <sub>2</sub>  |
| 31       | 29.41          | Glyceryl-glycoside          | C <sub>9</sub> H <sub>18</sub> O <sub>8</sub>   |
| 32       | 32.02          | Maltose                     | C <sub>12</sub> H <sub>22</sub> O <sub>11</sub> |
| 33       | 33.80          | Sucrose                     | C <sub>12</sub> H <sub>22</sub> O <sub>11</sub> |
| 34       | 35.00          | Mannobiose                  | C <sub>12</sub> H <sub>22</sub> O <sub>11</sub> |
| 35       | 36.34          | Melibiose                   | C <sub>12</sub> H <sub>22</sub> O <sub>11</sub> |
| 36       | 37.42          | 3-O-Feruloylquinic acid     | C <sub>17</sub> H <sub>20</sub> O <sub>9</sub>  |
| 37       | 37.84          | Galactinol                  | C <sub>12</sub> H <sub>22</sub> O <sub>11</sub> |
| 38       | 38.34          | 3-O-Coumaroyl-D-quinic acid | C <sub>16</sub> H <sub>18</sub> O <sub>8</sub>  |
| 39       | 39.64          | 5-O-Feruloylquinic acid     | C <sub>17</sub> H <sub>20</sub> O <sub>9</sub>  |
| 40       | 39.82          | Chlorogenic acid            | C <sub>16</sub> H <sub>18</sub> O <sub>9</sub>  |
| 41       | 42.22          | Raffinose                   | C <sub>18</sub> H <sub>32</sub> O <sub>16</sub> |
